# Supplementary material
Source: Springer Nature journal article supplement (https://www.springermedizin.de/resource/supplementary/12913_2006_249_MOESM2_ESM.pdf/9534688)
Supplement: MOESM2 [file 9534688]

# Data flowchart

Participant's  
EPR system

Statistics Norway

Patients' data linked to  
project IDs (de-identified  
personal IDs)

Project IDs linked to patients' CPR  
number and doctors' HPR  
numbers

Project ID's linked to  
pseudonymous CPR and  
HPR numbers

Project site  
University of Oslo

Norwegian Prescription  
Database - NorPD  
(Pseudonymous)

Prescription data linked to  
Project IDs
